# Supplementary material
Source: PubMed Central journal article supplement (PMC7030818)
Supplement: jciinsight-5-132522-s036.pdf [file jciinsight-5-132522-s036.pdf]

# 1 Supplementary Figures

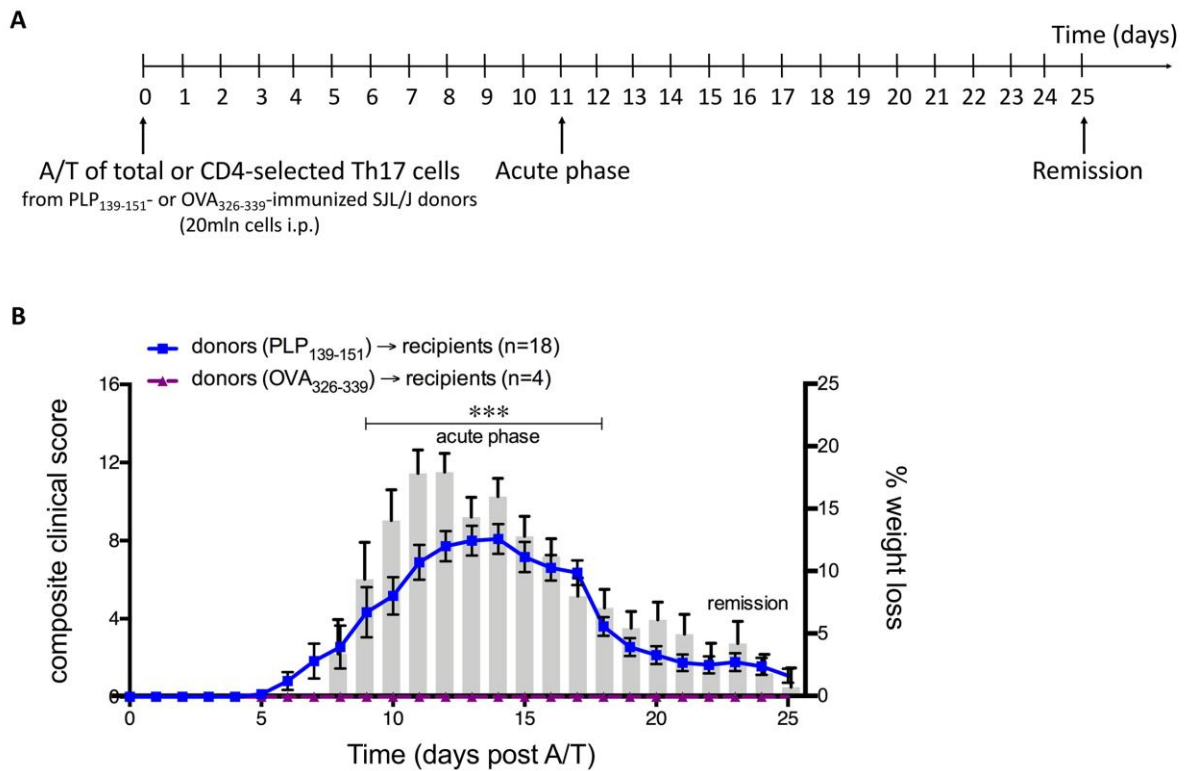

2

## 3 Supplementary Fig. 1. Schematic of A/T SJL/J EAE induction protocol, experimental

4 **timeline and clinical course.** (A) Total or CD4-selected Th17 lymphocytes from 6-10 week

5 old SJL/J donor mice immunized with either PLP<sub>139-151</sub> (n=9) or OVA<sub>326-339</sub> (n=2) in CFA,

6 were harvested at day 9 post-immunization and adoptively transferred into 6-10 week old

7 SJL/J recipient mice (n=18 received from PLP<sub>139-151</sub>-immunized donors; n=4 received from

8 OVA<sub>326-339</sub>-immunized donors). Mice were sacrificed either at acute phase (day 11 post-A/T)

9 or remission (25 days post-A/T). (B) The graph illustrates the composite clinical score (16-

10 point scale) of recipient mice. Values are shown as mean +/- S.E.M. Statistical analysis by

11 two-way ANOVA with p<0.0001. Changes in weight were monitored throughout the

12 experiment

13

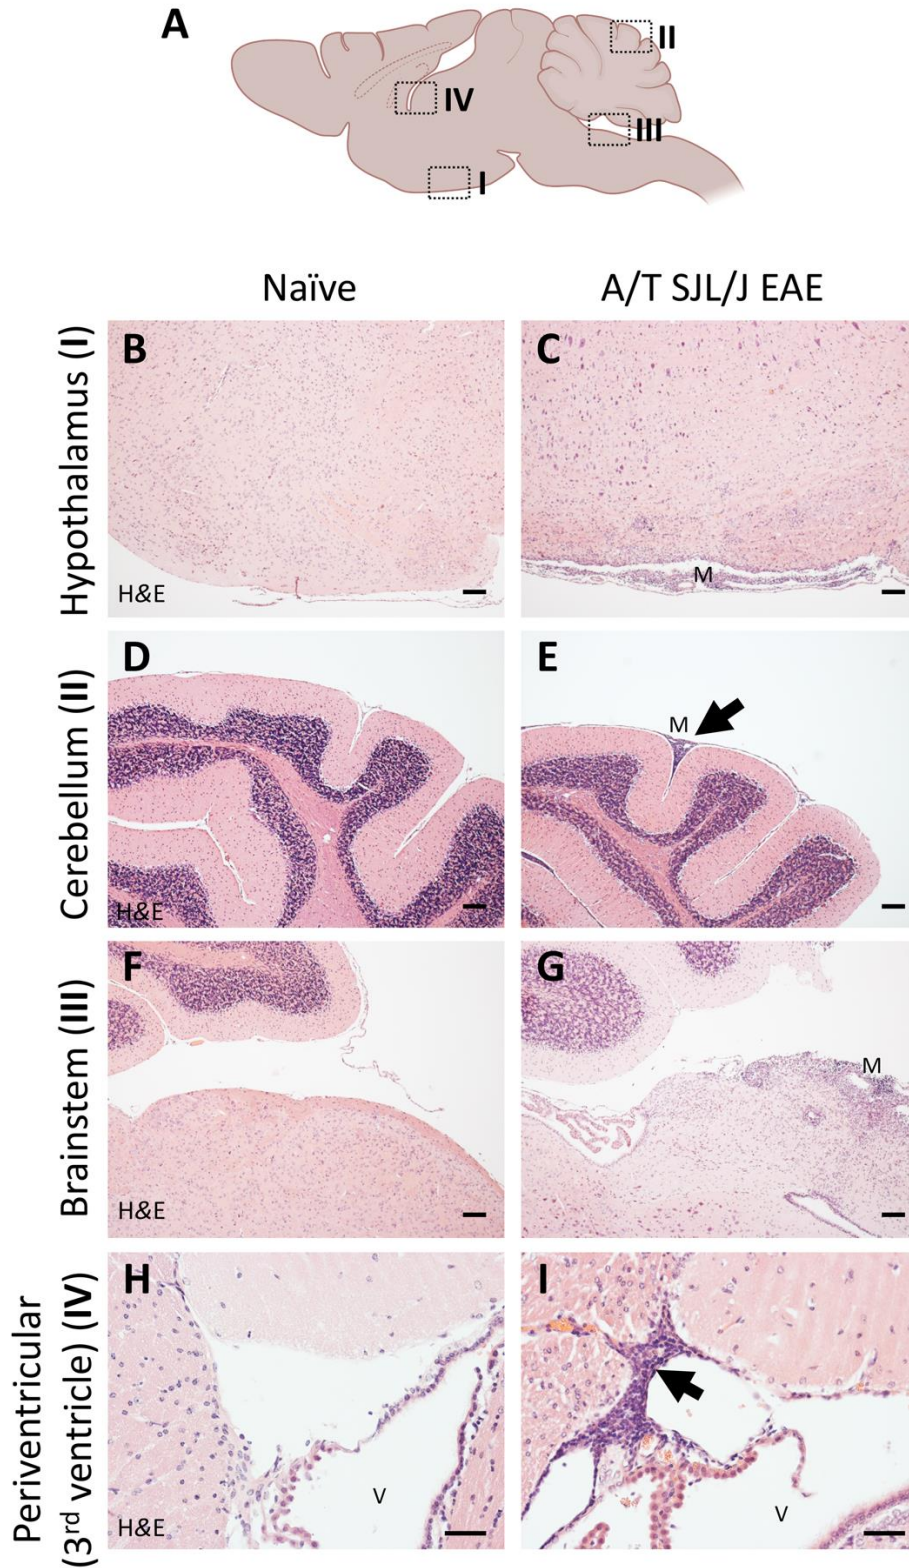

14

15 **Supplementary Fig. 2. Meningeal and periventricular inflammation in A/T SJL/J EAE**

16 **mice. (A)** Diagram of the mouse brain sectioned through the sagittal neuraxis, showing areas

17 of the hypothalamus (I), cerebellum (II), brainstem (III) and periventricular (3<sup>rd</sup> ventricle)

18 region (**IV**) imaged in **B-I**. (**B-I**) Inflammation as assessed by Hematoxylin & Eosin (HE)  
19 staining at day 11 (acute phase) post-A/T. Aggregates of cells (in blue) are seen in meninges  
20 lining the hypothalamus (**C**), the cerebellum (**E**) and the brainstem (**G**) as well as  
21 periventricular inflammation at the 3<sup>rd</sup> ventricle (arrow in **I**) in A/T SJL/J EAE mice at the  
22 acute phase. Such aggregates of meningeal cells are not detected in naïve mice (**B, D, F, H**),  
23 as expected. Scale bar in **B-G** is 200 µm. Scale bar **H-I** is 50 µm.

24

25

26

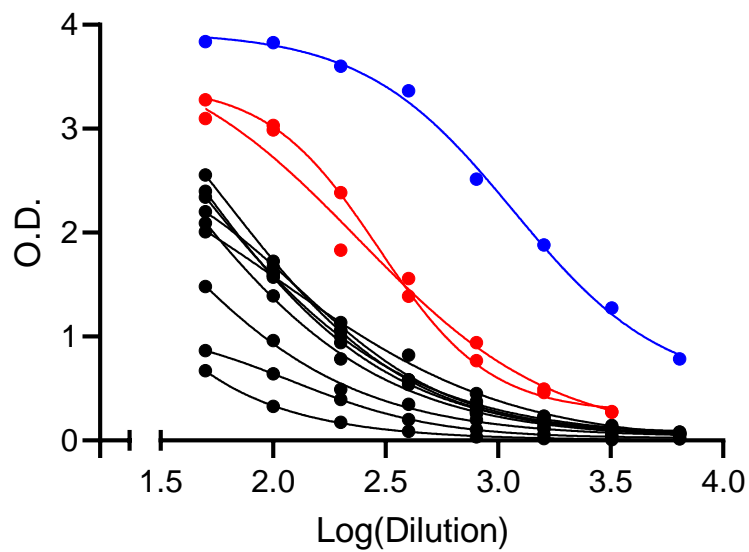

27 **Supplementary Fig. 3. Example of anti-mouse MOG IgM plate results and dilution**  
28 **curves from sera.** Anti-MOG IgM was measured by ELISA. Each serum sample was plated  
29 in a 1:2 serial dilution and curves were generated using a 4-parameter logistic regression.  
30 IC50 was taken from each curve and then normalized to a hMOG-immunized C57Bl/6  
31 pooled control lot that was run on the same plate. Black curves denote hMOG-immunized  
32 C57Bl/6 mice (n=9). Red curves denote unimmunized C57Bl/6 mice (n=2). Blue curve  
33 denotes hMOG-immunized *Aicda*<sup>-/-</sup> mouse (n=1).

34

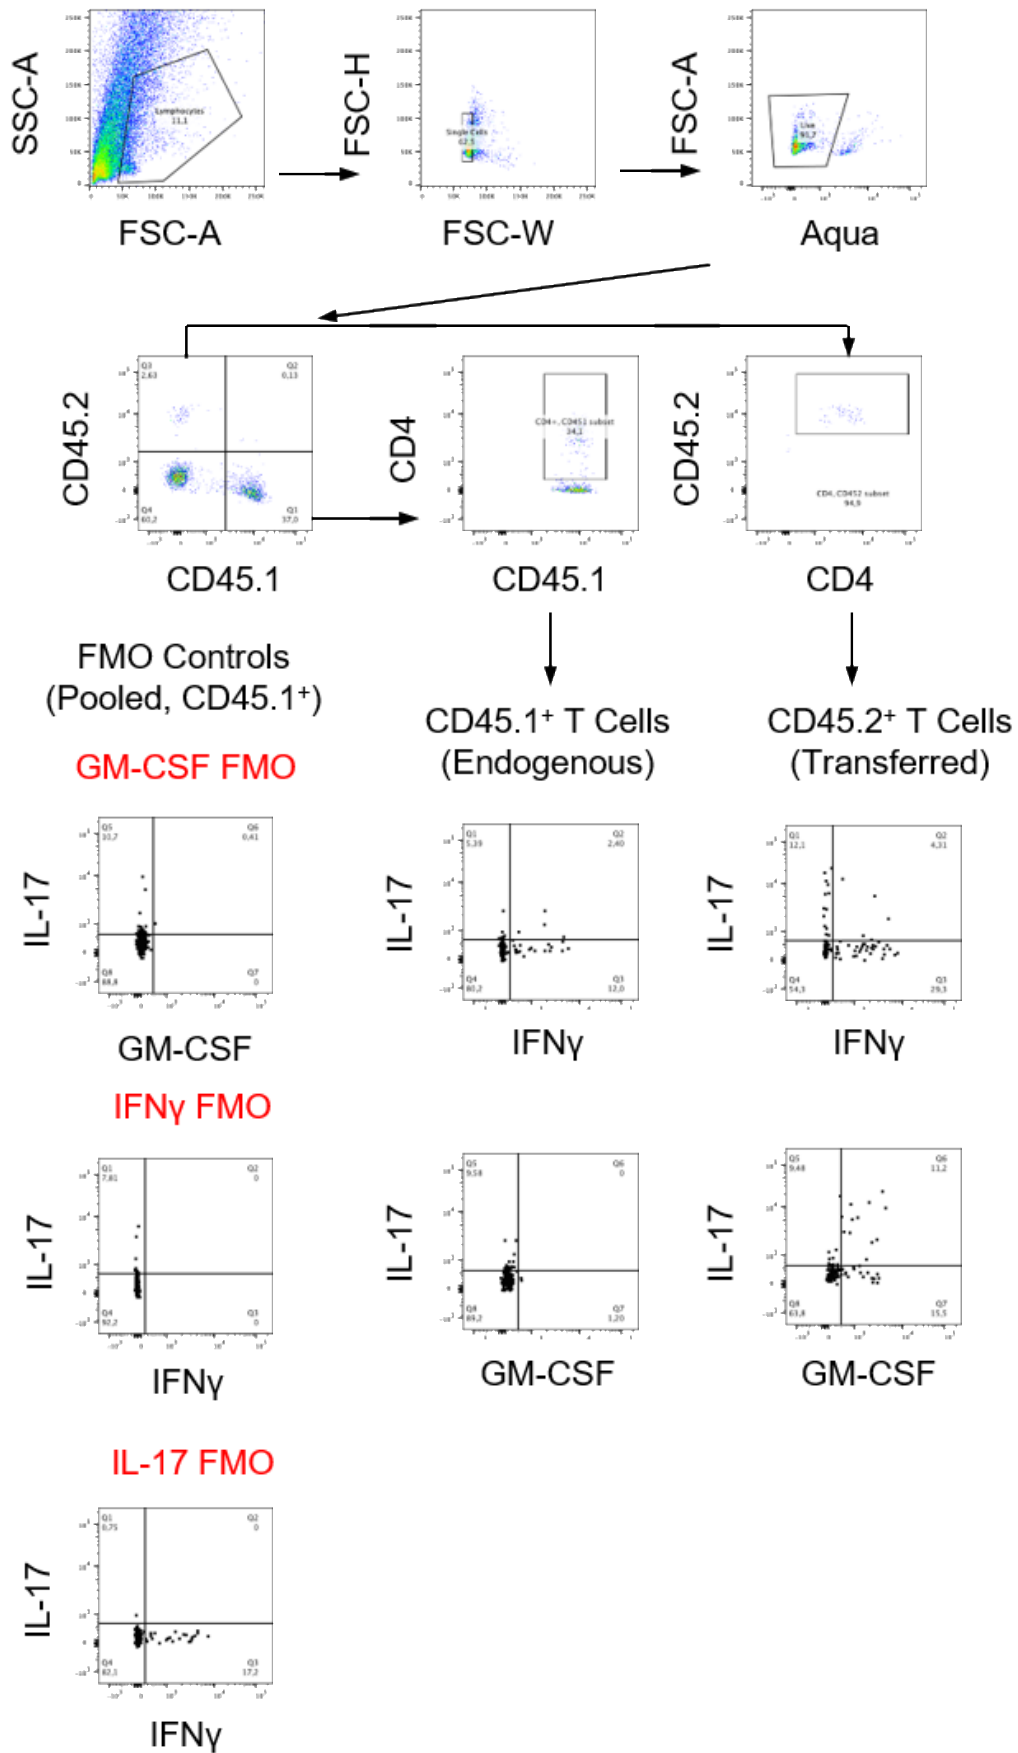

36 **Supplementary Fig. 4. Gating strategy for CD4<sup>+</sup> T cells following EAE.** Samples were  
37 gated on lymphocytes>singlets>live cells as a starting point. Cells were further segmented by  
38 CD45.1 versus CD45.2 markers to determine the endogenous or transferred source of  
39 hematopoietic cells. Next, CD4<sup>+</sup> were gated from CD45<sup>+</sup> cells to visualize T cells. Finally,  
40 CD45.X<sup>+</sup>CD4<sup>+</sup> were then assayed for the production of GM-CSF, IFN $\gamma$ , and IL-17. Double-  
41 producers of IL-17/IFN $\gamma$  and IL-17/GM-CSF were also determined from these plots. FMO  
42 (Fluorescence minus one) controls are shown from pooled samples.

43

44

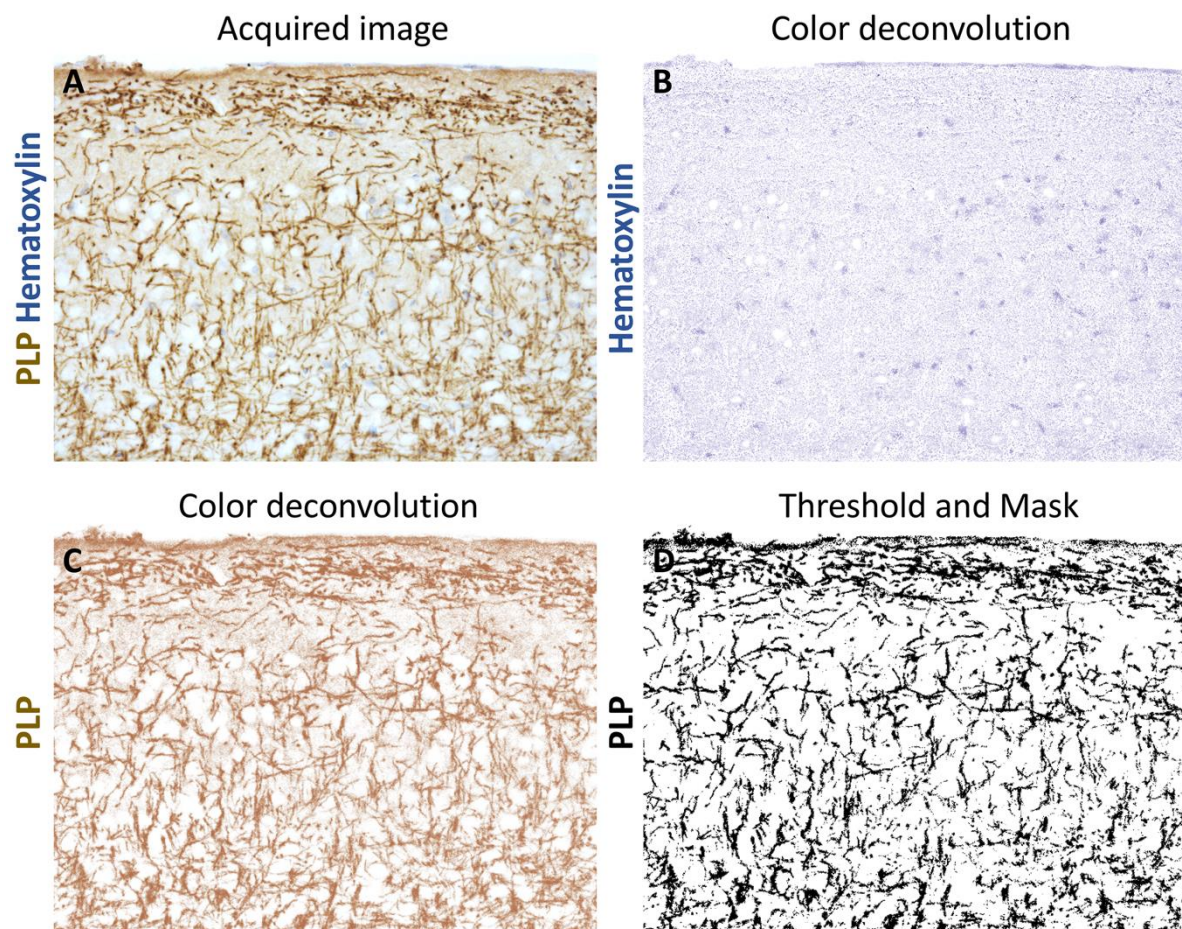

46

47 **Supplementary Fig. 5. Example of image processing for quantification analysis.** Example  
 48 of red/green/blue (RGB) image of (A) proteolipid protein (PLP)/Hematoxylin staining of the  
 49 somatosensory cortex from a naïve mouse acquired at 20x magnification using a light  
 50 microscope (Axioscope, Zeiss). Using the color deconvolution plugin in ImageJ 1.15s  
 51 (National Institutes of Health), the RGB image was separated into single color channels for  
 52 (B) hematoxylin and (C) PLP. (D) In ImageJ, the single-color channel for PLP was subjected  
 53 to thresholding to create a mask that captures the specific staining. The region of interest  
 54 (ROI) was outlined using the freehand tool. The ROI was then subjected to the “area  
 55 fraction” measurement to quantify the percentage of thresholded staining per ROI.

56

57

58 **Supplementary tables**

**Supplementary table 1: Incidence of meningeal and periventricular inflammation in A/T SJL/J EAE**

|                                        | <b>Meningeal Cortex</b> | <b>Meningeal Hypothalamus</b> | <b>Meningeal Cerebellum</b> | <b>Meningeal Brainstem</b> | <b>Periventricular (4<sup>rd</sup> ventricle)</b> | <b>Periventricular (3<sup>th</sup> ventricle)</b> |
|----------------------------------------|-------------------------|-------------------------------|-----------------------------|----------------------------|---------------------------------------------------|---------------------------------------------------|
| <b>Naïve</b>                           | 0/3                     | 0/3                           | 0/3                         | 0/3                        | 0/3                                               | 0/3                                               |
| <b>A/T SJL/J EAE acute<sup>1</sup></b> | 12/12 <sup>Δ</sup>      | 11/12 (92%) <sup>Δ</sup>      | 9/12 (75%)                  | 4/12 (33%)                 | 1/12 (8%)                                         | 5/12 (42%)                                        |

<sup>1</sup>Female 6-10 week old SJL/J mice received an adoptive transfer of PLP-primed Th17 CD4<sup>+</sup> T cells and were assessed for meningeal and periventricular inflammation by Hematoxylin & Eosin (HE) staining at day 11 (acute) post-adoptive transfer.

Delta (<sup>Δ</sup>) indicates statistically significant changes between naïve mice and A/T SJL/J EAE mice at acute stage of the disease; p≤0.05 by Kruskal-Wallis test with Dunn's correction for multiple comparisons.

59

60



**Supplementary table 2. Antibodies for immunohistochemistry and flow cytometry**

| <b>Primary antibody</b>     | <b>Clone</b>  | <b>Target</b>                                          | <b>Dilution</b> | <b>Antigen retrieval</b> | <b>Source</b>                    |
|-----------------------------|---------------|--------------------------------------------------------|-----------------|--------------------------|----------------------------------|
| <i>Immunohistochemistry</i> |               |                                                        |                 |                          |                                  |
| PLP                         | mAb, plpc1    | Proteolipid protein (myelin)                           | 1:100           | EDTA                     | Bio-Rad, MCA839G                 |
| TPPP/p25                    | mAb, EPR3316  | tubulin polymerization promoting protein               | 1:500           | EDTA                     | Abcam, ab92305                   |
| Iba-1                       | mAb, ERP16589 | ionized calcium binding adaptor molecule 1             | 1:8000          | Citrate                  | Abcam, ab178847                  |
| GFAP                        | pAb           | Glial fibrillary acidic protein (astrocytes)           | 1:4000          | EDTA                     | Dako, Z0334                      |
| NeuN                        | mAb, A60      | Neuronal nuclei (neurons)                              | 1:1000          | EDTA                     | Millipore, MAB377                |
| mtHSP70                     | mAb, 30A5     | Mitochondrial heat shock protein 70 (metabolic stress) | 1:50            | EDTA                     | Enzo life science, ADI-SPS-825-F |
| 8OHG                        | pAb           | 8-Hydroxy-2'-guanosine (oxidative injury)              | 1:500           | EDTA                     | Abcam, Ab10802                   |
| Fibronectin*                | mAb, GW20021F | stroma                                                 | 1:300           | -                        | Sigma, 53-0452-83                |
| CD45-AF594*                 | mAb, 30-F11   | Leukocytes and macrophages                             | 1:200           | -                        | Biolegend, 103144                |
| CD3-AF594*                  | mAb, 17A2     | T cells                                                | 1:100           | -                        | Biolegend, 100240                |
| B220-AF488*                 | mAb, RA3-6B2  | B cells                                                | 1:100           | -                        | eBioscience, 53-0452-82          |
| <i>Flow cytometry</i>       |               |                                                        |                 |                          |                                  |
| CD4-FITC                    | mAb, RM4-5    | MHC class II restricted T cells                        | 1:200           | -                        | eBioscience, 11-0042             |
| CD4-PE                      | mAb, RM4-5    | MHC class II restricted T cells                        | 1:100           | -                        | eBioscience, 12-0042             |

|                                                                                                                                                                                            |               |                                                  |       |   |                      |
|--------------------------------------------------------------------------------------------------------------------------------------------------------------------------------------------|---------------|--------------------------------------------------|-------|---|----------------------|
| CD8-BV711                                                                                                                                                                                  | mAb, 53-6.7   | MHC class I restricted T cells                   | 1:200 | - | Biolegend, 100748    |
| CD3-APC                                                                                                                                                                                    | mAb, 17A2     | T cells                                          | 1:200 | - | eBioscience, 17-0032 |
| B220-BV605                                                                                                                                                                                 | mAb, RA3-6B2  | B cells                                          | 1:200 | - | Biolegend, 103244    |
| CD19-PE                                                                                                                                                                                    | mAb, eBio1D3  | B cells                                          | 1:200 | - | eBioscience, 12-0193 |
| CD45.1-APCeF780                                                                                                                                                                            | mAb, A20      | Lymphocytes and macrophages                      | 1:200 | - | eBioscience, 47-0453 |
| CD45.1-APC                                                                                                                                                                                 | mAb, A20      | Lymphocytes and macrophages                      | 1:200 | - | eBioscience, 17-0453 |
| CD45.2-eF450                                                                                                                                                                               | mAb, 104      | Lymphocytes and macrophages                      | 1:200 | - | eBioscience, 48-0454 |
| GM-CSF-FITC                                                                                                                                                                                | mAb, MP1-22E9 | Granulocyte-macrophage colony-stimulating factor | 1:200 | - | eBioscience, 11-7331 |
| IL-17a-PerCP-Cy5.5                                                                                                                                                                         | mAb, eBio17B7 | Interleukin 17 alpha                             | 1:100 | - | eBioscience, 45-7177 |
| IFN $\gamma$ -PE-Cy7                                                                                                                                                                       | mAb, XMG1.2   | Interferon gamma                                 | 1:100 | - | eBioscience, 25-7311 |
| Brefeldin A                                                                                                                                                                                |               |                                                  |       |   |                      |
| mAb, monoclonal antibody; pAb, polyclonal antibody; EDTA, 10mM Tris 1mM EDTA buffer pH 9.0; Citrate, 10mM citrate buffer pH 6.0; the asterisk indicates antibodies used on frozen sections |               |                                                  |       |   |                      |

62  
63
